1       **Glasses Against transmission of SARS-CoV-2 in the community**  
2                               **(GLASSY): a pragmatic randomized trial**

3  
4

5     Atle Fretheim<sup>1,2\*</sup>, Ingeborg Hess Elgersma<sup>1</sup>, Arnfinn Helleve<sup>3</sup>, Petter Elstrøm<sup>1,4</sup>, Oliver Kacelnik<sup>1,4</sup> Lars  
6     G. Hemkens<sup>5,6,7</sup>

7

8     <sup>1</sup>Centre for Epidemic Interventions Research (CEIR), Norwegian Institute of Public Health, Oslo,  
9     Norway

10    <sup>2</sup>Faculty of Health Sciences, Oslo Metropolitan University, Oslo, Norway

11    <sup>3</sup>Centre for Evaluation of Public Health Measures, Norwegian Institute of Public Health, Oslo, Norway

12    <sup>4</sup>Division for Infection Control, Norwegian Institute of Public Health, Oslo, Norway

13    <sup>5</sup>Department of Clinical Research, University Hospital Basel, University of Basel, Basel, Switzerland

14    <sup>6</sup>Meta-Research Innovation Center at Stanford (METRICS), Stanford University, Stanford, USA

15    <sup>7</sup>Meta-Research Innovation Center Berlin (METRIC-B), Berlin Institute of Health, Berlin, Germany.

16

17    \*Corresponding author.

18    E-Mail: [atle.fretheim@fhi.no](mailto:atle.fretheim@fhi.no)

19

20

## 21 **Abstract**

22 **Background** Observational studies have reported an association between use of eye protection and  
23 reduced risk of SARS-CoV-2 infection and other respiratory viruses, but as for most non-  
24 pharmaceutical interventions for infection control, no randomized trials have been conducted.

25 We conducted a randomized trial to evaluate the effectiveness of recommending the use of glasses in  
26 public as protection against being infected with SARS-CoV-2 and other respiratory viruses.

27 **Methods and findings** This was a pragmatic, randomized, trial in Norway from 2 February to 24 April  
28 2022 where all adult members of the public who did not regularly wear glasses, had no symptoms of  
29 COVID-19 and no COVID-19 in the last 6 weeks, were eligible. Participants randomized to the  
30 intervention group were asked to wear glasses (e.g. sunglasses) for 2 weeks when close to others in  
31 public spaces. The primary outcome was positive COVID-19 test result notified to the Norwegian  
32 Surveillance System for Communicable Diseases (MSIS). Secondary outcomes included positive  
33 COVID-19 test result based on self-report and episode of respiratory infection based on self-report of  
34 symptoms. We randomized 3717 participants. All were identified and followed up in the registries and  
35 87% responded to the end of study-questionnaire. The proportions with a notified positive COVID-19  
36 test in the national registry were 3.7% in the intervention group (68/1852) and 3.5% (65/1865) in the  
37 control group (95% CI for risk difference -1.0% to 1.4%; relative risk 1.10, 95% CI 0.75 to 1.50). The  
38 proportions with a positive COVID-19 test based on self-report were 9.6% and 11.5% (95% CI for risk  
39 difference -3.9% to 0.1%; relative risk 0.83, 95% CI 0.69 to 1.00). The risk of respiratory infections  
40 based on self-reported symptoms was lower in the intervention group (31% vs. 34%; 95% CI for risk  
41 difference -3.3% to -0.3%; relative risk 0.90, 95% CI 0.82 to 0.99).

42 **Conclusions:** Our results indicate that asking people to wear glasses may protect the public against  
43 respiratory infections, but the findings are not certain, and the study needs replication. Although the  
44 evidence is uncertain, and the effect probably modest at best, wearing glasses may be worth  
45 considering as one component in the infection control toolbox since it is a simple, low burden, and  
46 low-cost intervention, with few negative consequences.

47  
48 **Trial registration:** ClinicalTrials.gov Identifier: [NCT05217797](https://clinicaltrials.gov/ct2/show/study/NCT05217797)

49

50 **Funding:** The costs of running the trial were covered by the Centre for Epidemic Interventions  
51 Research (CEIR), Norwegian Institute of Public Health. The authors received no specific funding for  
52 this work

53

54 **Keywords**

55 COVID-19; non-pharmaceutical intervention; prevention; glasses; eye protection; personal protective  
56 equipment; pragmatic trial; randomized trial

57

## 58 **Introduction**

59 Use of eye protective gear for infection control was proposed over 100 years ago [1], but has received  
60 little attention during the ongoing COVID-19 pandemic, except as part of Personal Protective  
61 Equipment (PPE) for health care workers [2].

62

63 A simple means of eye protection is to wear glasses. Many have easy access to sunglasses, and it  
64 requires little effort to use them in everyday life. Repurposing sunglasses for infection control could be  
65 a simple, readily available, environmentally friendly, safe, and sustainable infection prevention  
66 measure. An association between wearing glasses and lower risk of respiratory viruses has been  
67 reported from observational studies, but to our knowledge no randomized trial of eye protection  
68 against respiratory virus infection has been conducted, neither in health care nor in community  
69 settings [3-6].

70

71 To inform decisions about the use of personal protection against SARS-CoV-2, we carried out a  
72 randomized trial of wearing glasses to reduce the risk of being infected with SARS-CoV-2 and other  
73 respiratory viruses.

## 74 **Methods**

75 The study protocol was published prior to the start of the study [7]. There were no major deviations  
76 from the protocol. We followed the CONSORT reporting guidelines for pragmatic trials [8].

77

### 78 **Participants**

79 We recruited participants via an online portal that we distributed to the Norwegian public through the  
80 media, online and print adverts and e-mails to members of survey panels of two data collection  
81 companies. All members of the public could take part who

- 82 1. were at least 18 years of age
- 83 2. did not regularly wear glasses
- 84 3. owned or could borrow glasses that they could use (e.g. sun-glasses)

- 85 4. had not contracted COVID-19 in the six weeks prior to participation
- 86 5. did not have COVID-19 symptoms when providing consent
- 87 6. were willing to be randomized to wear, or not wear glasses outside their home when close to
- 88 others for a 2-week period.
- 89 7. provided informed consent

90 Those dependent on visual aids who could use contact lenses if allocated to the control group, were  
91 eligible.

## 92 **Intervention**

93 The participants allocated to the intervention group were asked to wear sunglasses or other types of  
94 glasses when close to other people outside their home (on public transport, in shopping malls etc.),  
95 over a 14-day period. The control group was encouraged not to wear glasses when close to others  
96 outside their home.

97

## 98 **Objective**

99 We aimed to evaluate whether wearing glasses has an impact on the risk of being infected by the  
100 SARS-CoV-2 virus or developing a respiratory infection.

101

## 102 **Outcomes**

103 All data were collected from national registries or the end of study survey. In general, data from  
104 administrative registries in Norway are reliable and of high quality and are used extensively in  
105 research [9]. All participants had to identify themselves using their personal ID-code, and were  
106 thereby identifiable in the national health registries. All PCR COVID-19 tests are analyzed by  
107 laboratories that report results directly to the Norwegian Surveillance System for Communicable  
108 Diseases (MSIS), so we can reasonably assume that all such tests are registered.

109

110 Primary outcome:

- 111 - Any positive COVID-19 test result notified to the Norwegian Surveillance System for  
112 Communicable Diseases (MSIS), from day 3 to day 17 of the study period.

113

114 Secondary outcomes:

- 115 - Any positive COVID-19 test result based on self-report, from day 1 to day 17 of the study  
116 period.
- 117 - Episode of respiratory infection based on self-report of symptoms from day 1 to day 17 of the  
118 study period. We defined respiratory infection as having one respiratory symptom (stuffed or  
119 runny nose, sore throat, cough, sneezing, heavy breathing) and fever, or one respiratory  
120 symptom and at least two more symptoms (body ache, muscular pain, fatigue, reduced  
121 appetite, stomach pain, headache, loss of smell, )
- 122 - Health care use for respiratory symptoms, self-reported, from day 1 to day 17 of the study  
123 period
- 124 - Health care use for injuries, self-reported, from day 1 to day 17 of the study period
- 125 - Health care use (all causes), self-reported, from day 1 to day 17 of the study period
- 126 - Health care use for respiratory symptoms as registered in Norwegian Patient Registry (NPR),  
127 from day 3 to day 28 of the study period
- 128 - Health care use for injuries (from day 1 to day 21 as registered in NPR and the Norwegian  
129 Registry for Primary Health Care (KPR), from day 3 to day 28 of the study period
- 130 - Health care use (all causes) as registered in NPR and KPR from day 1 to day 21 of the study  
131 period

132

133 We do not report on the latter four outcomes here as we do not have access to this data for the time  
134 being.

135

136 We also asked the participants about adherence to the intervention, use of face masks, testing  
137 behavior, and whether they had any negative experiences with taking part in the study. See  
138 supporting information (S1) for questionnaire.

139

#### 140 **Sample size**

141 We originally estimated a need for around 22 000 participants. This was based on an expected event  
142 rate of 2% in the control group and 1.5% in the intervention group. The underlying assumptions are  
143 provided in the study protocol [7].

144

### 145 **Randomization and masking**

146 The participants were automatically randomized and informed about which group they were allocated  
147 to immediately after signing the consent form in the online recruitment platform (Nettskjema). No  
148 masking was feasible, except for in the analysis phase. One member of our team (AH) provided the  
149 chief analyst (IHE) with a data file where group allocation was blinded. The chief analyst presented  
150 the main results to the project team who were also blinded to the group allocation (and data on use of  
151 glasses). We discussed how we would interpret the findings depending on whether one group or the  
152 other was the intervention group, and we prepared a short report that we posted online before  
153 unblinding ourselves to the group allocation [10].

154

### 155 **Statistical methods**

156 We conducted unadjusted analyses to estimate the relative risk and risk difference for the  
157 prespecified outcomes, with 95% confidence intervals calculated with the Wald method. All analyses  
158 adhered to the intention to treat principle and we included all randomized participants in the  
159 denominator in all our main analyses. Where outcome data was missing, we assumed that there was  
160 no event (no positive COVID-19 test, no symptoms, no use of health care services etc.). As a post  
161 hoc sensitivity analysis, we also conducted a crude (unadjusted) per protocol analysis where we  
162 excluded participants using glasses in the control group and participants not using glasses in the  
163 intervention group.

164

165 As planned, we conducted a subgroup analysis for participants that used contact lenses, with the  
166 hypothesis that the effect would be smaller for this group since control group participants were  
167 allowed to use contact lenses. One possible mechanism for viral transmission is that the viruses  
168 attach to ACE-2 receptors in the cornea, which we assume are protected by contact lenses [5]. We  
169 also conducted subgroup analyses for groups with different vaccination status and for those with a  
170 history of COVID-19. Differences in treatment effects across subgroups were assessed using a chi-  
171 square test of interaction.

172

173 The trial is registered at ClinicalTrials.gov (NCT05217797).

174

## 175 **Data management**

176 We used the University of Oslo's web-based survey platform Nettskjema for screening and data  
177 collection, and their service for secure storage of research data (TSD).

178

179 We collected directly identifiable data (name, person identification number and e-mail address). Along  
180 with a code for linking data, the person identification number was sent to the registries. Each register  
181 deleted the person identification number before register-data and code for linking were delivered and  
182 stored in TSD. The questionnaire data were processed in the same way. The codes for linking data to  
183 the person identifier was kept in a securely stored database, with limited access.

184

## 185 **Ethics**

186 Information about the goal of the trial and eligibility study were provided through an online portal, and  
187 eligible participants consented to participation using the national digital signature service (Posten  
188 signering). In our judgement, taking part entailed negligible risk and the findings can potentially inform  
189 decisions about infection control measures in the ongoing and future epidemics. Thus, we considered  
190 the risk-benefit ratio morally defensible.

191

192 The protocol was approved by the Regional Ethics Committee of South-East Norway (application  
193 number 428685).

## 194 **Results**

195 Recruitment commenced on 2 February 2022. Of the 7506 individuals who showed interest in  
196 participating in the trial by completing the screening form, 3717 were randomized (Figure 1). Most  
197 participants entered the trial soon after initiation, following wide media coverage of the launch of the  
198 trial on Norwegian national television and other media outlets (Figure 2). Another wave of recruitment  
199 occurred after two data collection companies invited members of their survey panels to take part in



200 the trial. We closed recruitment 24 April 2022. Most participants were female, had a mean age of 47  
201 years, and had received three or more doses of vaccination against COVID-19 (Table 1).  
202

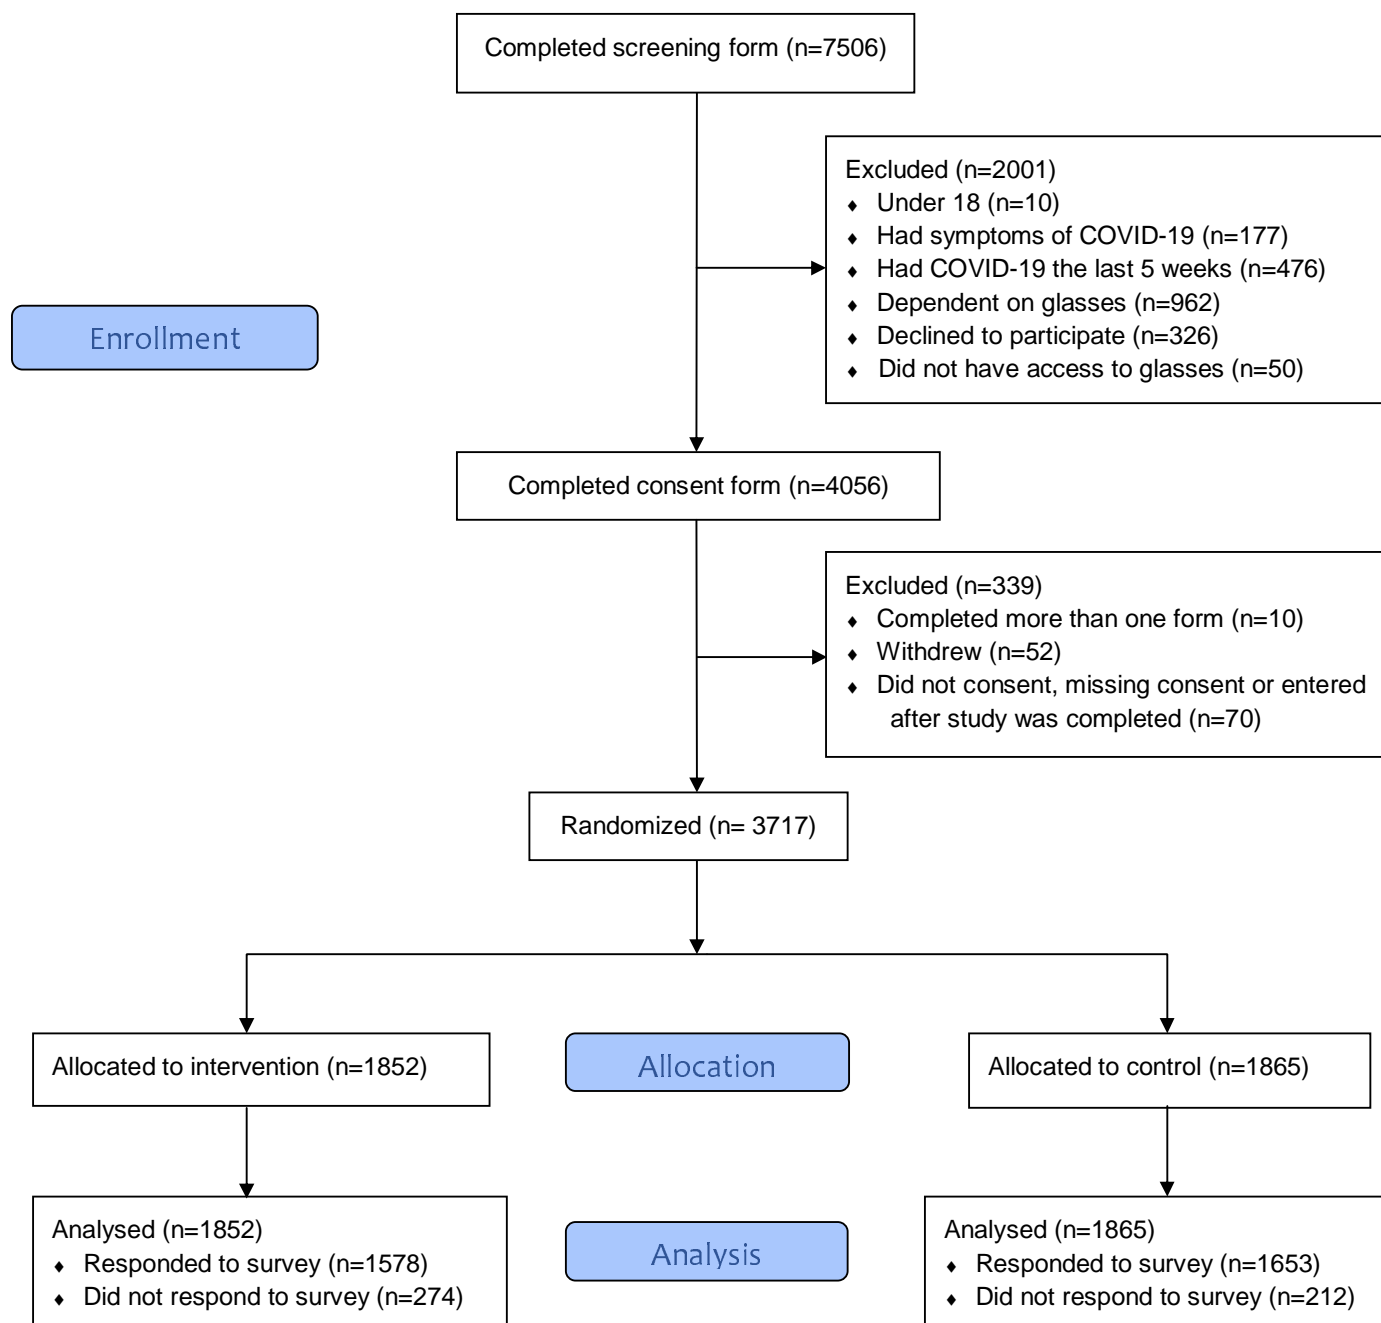

203 **Fig 1. Flow diagram of participants**

204

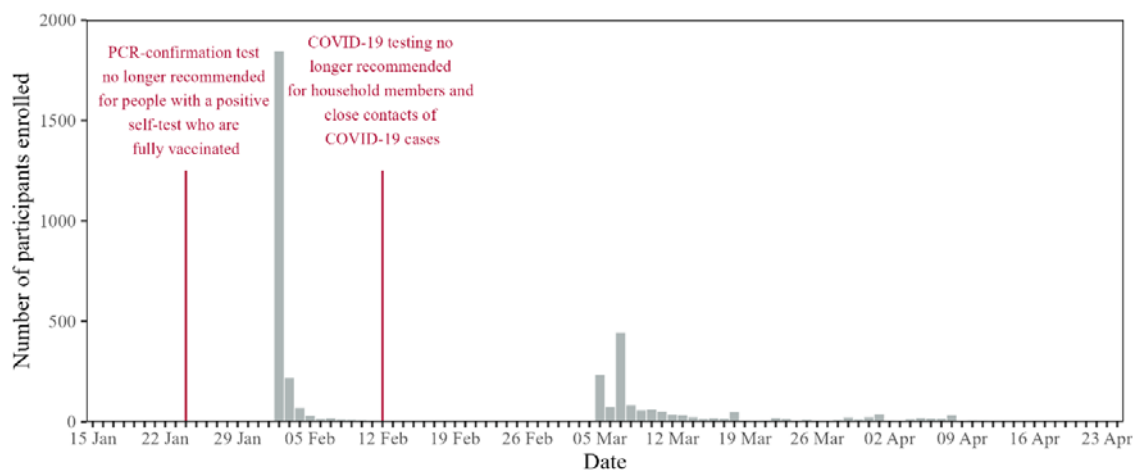

**Fig 2. Recruitment over time.** Grey bars represent the number of participants enrolled each day. Red vertical lines represent major changes in testing recommendations from national health authorities.

205

206

207 **Table 1. Baseline characteristics of trial participants**

208

|                                      | Intervention group (n=1852) | Control group (n=1865) |
|--------------------------------------|-----------------------------|------------------------|
| Female                               | 1193 (64.4%)                | 1246 (66.8%)           |
| Male                                 | 659 (35.6%)                 | 619 (33.2%)            |
| Mean age at inclusion (sd)           | 46.9 (15.1)                 | 46.8 (15.1)            |
| Number of COVID-19 vaccines received |                             |                        |
| 0                                    | 50 (2.7%)                   | 58 (3.1%)              |
| 1                                    | 19 (1.0%)                   | 21 (1.1%)              |
| 2                                    | 361 (19.5%)                 | 335 (18.0%)            |
| 3 or more                            | 1422 (76.8%)                | 1451 (77.8%)           |

209

210 The main findings are summarized in Table 2. For notified COVID-19 cases the proportions were  
 211 68/1852 (3.7%) in the intervention group, and 65/1865 (3.5%) in the control group (RR 1.10; 95% CI  
 212 0.76 to 1.50). The proportion with self-reported positive tests was lower in the intervention group,  
 213 177/1852 (9.6%) vs. 214/1865 (11.3%) (RR 0.83; 95% CI 0.69 to 1.00). Almost a third of all  
 214 participants reported symptoms of respiratory infection, with a lower proportion in the intervention  
 215 group than in the control group (RR 0.90; 95% CI 0.82 to 0.99). There were few notified COVID-19  
 216 cases among the non-respondents to the survey (8 in the intervention group and 3 in the control  
 217 group).

218 **Table 2. Main findings**

|                                                           | Intervention group<br>(n=1852) | Control group<br>(n=1865) | Relative<br>risk       | Absolute<br>risk<br>difference |
|-----------------------------------------------------------|--------------------------------|---------------------------|------------------------|--------------------------------|
| Notified COVID-19 case <sup>1</sup>                       | 68/1852 (3.7%)                 | 65/1865 (3.5%)            | 1.10 (0.75<br>to 1.50) | 0.2% (-1.0<br>to 1.4)          |
| Self-reported COVID-19<br>case <sup>2</sup>               | 177/1852 (9.6%)                | 214/1865<br>(11.5%)       | 0.83 (0.69<br>to 1.00) | -1.9% (-3.9<br>to 0.1)         |
| Respiratory infection <sup>3</sup>                        | 571/1852 (30.8%)               | 636/1865<br>(34.1%)       | 0.90 (0.82<br>to 0.99) | -3.3% (-6.3<br>to -0.3)        |
| Health care use, all cause                                | 80/1852 (4.3%)                 | 83/1865 (4.5%)            | 0.97 (0.72<br>to 1.30) | -0.1% (-1.4<br>to 1.2)         |
| - Health care use, due<br>to airway symptoms <sup>3</sup> | 15/1852 (0.8%)                 | 20/1865 (1.1%)            | 0.76 (0.39<br>to 1.50) | -0.3% (-0.9<br>to 0.4)         |
| - Health care use, due<br>to injuries <sup>3</sup>        | 24/1852 (1.3%)                 | 16/1865 (0.9%)            | 1.50 (0.81<br>to 2.80) | 0.4% (-0.2<br>to 1.1)          |

219 <sup>1</sup> Date of test between day 3 and day 17 after inclusion in the study

220 <sup>2</sup> Date of test Between day 1 and day 17 after inclusion in the study

221 <sup>3</sup>Self-reported

222

223 We report behavioral outcomes in Table 3. In the intervention group, 71% of the participants reported  
 224 using glasses often, almost always, or always, while the corresponding proportion in the control group  
 225 was 11% (95% CI for difference 58 to 63%). The use of face masks was higher in the intervention-  
 226 group (40% vs. 30%, 95% CI for difference 7 to 13%). The proportion of participants who took a  
 227 COVID-test during the trial period was similar in the two groups (50% vs. 49%). We also asked the  
 228 participants whether they normally commuted to work/studies by public transportation, and the  
 229 proportion reporting that they did was lower in the intervention group (23% vs. 27%; 95% CI for  
 230 difference -7 to -1%).

231

232 **Table 3. Behavioral outcomes**

|                                                | Intervention group<br>(n=1852) | Control group<br>(n=1865) | Risk difference (95%<br>CIs) |
|------------------------------------------------|--------------------------------|---------------------------|------------------------------|
| Responded to survey                            | 1578/1852 (85.2%)              | 1653/1865 (88.6%)         | -3.4% (-5.6 to -1.3)         |
| Use of glasses                                 |                                |                           |                              |
| At least 50% of the time                       | 1306/1852 (70.5%)              | 196/1865 (10.5%)          | 60.0% (57.5 to 62.5)         |
| - Always                                       | 575/1852 (31.0%)               | 60/1865 (3.2%)            | 27.8% (25.6 to 30.1)         |
| - Almost always<br>(75 to 100% of<br>the time) | 524/1852 (28.3%)               | 81/1865 (4.3%)            | 24.0% (21.7 to 26.2)         |
| - Often (50 to<br>75% of the<br>time)          | 207/1852 (11.2%)               | 55/1865 (2.9%)            | 8.2% (6.6 to 9.9)            |
| - Sometimes (25<br>to 50% of the<br>time)      | 91/1852 (4.9%)                 | 59/1865 (3.2%)            | 1.8% (0.5 to 3.0)            |

|                                                |                  |                   |                         |
|------------------------------------------------|------------------|-------------------|-------------------------|
| - Almost never<br>(up to 25% of<br>the time)   | 101/1852 (5.5%)  | 339/1865 (18.2%)  | -12.7% (-14.8 to -10.7) |
| - Never                                        | 78/1852 (4.2%)   | 1054/1865 (56.5%) | -52.3% (-54.7 to -49.9) |
| Use of facemasks                               |                  |                   |                         |
| At least 50% of the time                       | 731/1852 (39.5%) | 554/1865 (29.7%)  | 9.8% (6.7 to 12.8)      |
| - Always                                       | 180/1852 (9.7%)  | 134/1865 (7.2%)   | 2.5% (0.7 to 4.3)       |
| - Almost always<br>(75 to 100% of<br>the time) | 319/1852 (17.2%) | 225/1865 (12.1%)  | 5.2% (2.9 to 7.4)       |
| - Often (50 to<br>75% of the<br>time)          | 232/1852 (12.5%) | 195/1865 (10.5%)  | 2.1% (0.0 to 4.1)       |
| - Sometimes (25<br>to 50% of the<br>time)      | 210/1852 (11.3%) | 227/1865 (12.2%)  | -0.8% (-2.9 to 1.2)     |
| - Almost never<br>(up to 25% of<br>the time)   | 250/1852 (13.5%) | 345/1865 (18.5%)  | -5.0% (-7.4 to -2.6)    |
| - Never                                        | 381/1852 (20.6%) | 524/1865 (28.1%)  | -7.5% (-10.3 to -4.8)   |
| Use of COVID-19 tests                          |                  |                   |                         |
| Tested                                         | 925/1852 (49.9%) | 914/1865 (49.0%)  | 0.9% (-2.3 to 4.2)      |
| - Home test and<br>test station                | 120/1852 (6.5%)  | 103/1865 (5.5%)   | 1.0% (-0.6 to 2.5)      |
| - Only test station                            | 10/1852 (0.5%)   | 13/1865 (0.7%)    | -0.2% (-0.7 to 0.3)     |
| - Only home test                               | 795/1852 (42.9%) | 798/1865 (42.8%)  | 0.1% (-3.0 to 3.3)      |
| - No                                           | 651/1852 (35.2%) | 739/1865 (39.6%)  | -4.5% (-7.6 to -1.4)    |

233

234 The results of the per protocol analysis, i.e. where we excluded non-adherent participants in both  
235 groups, are presented in Table S1. There were practically no differences between these estimates  
236 and those of the main analysis. Subgroup analyses did not suggest any interaction effects, except  
237 between vaccination status and relative risk of notified COVID-19 (Tables S2 and S3).

238

239 In total 76 participants reported having negative experiences with taking part in the trial (53 in the  
240 intervention group and 23 in the control group), and all but one elaborated using free text. The most  
241 common complaint concerned the combination of glasses and face masks, especially fogging (21 in  
242 the intervention group mentioned this). Wearing glasses felt uncomfortable or tiring by some, and a  
243 few complained over reduced vision due to using sunglasses or reading glasses. One person in the  
244 intervention group reported a fall due to reduced vision. A few felt silly when wearing glasses or  
245 sunglasses, e.g. inside a cafe. In the control group there were some who reported headaches or other  
246 problems from not being able to use glasses.

247

## 248 **Discussion**

249 The findings from this first randomized trial of eye protection against viral spread indicate that using  
250 glasses in public may protect against respiratory viruses, but the evidence is uncertain, and more  
251 trials are needed to corroborate this evidence.

252

### 253 **Comparison with other studies**

254 A recent systematic review of studies estimating the impact of eye protection on transmission of  
255 SARS-CoV-2 identified 5 observational studies, all conducted among health workers in various  
256 settings [5]. With one exception, all studies reported a clear association between use of eye protection  
257 and reduced infection risk, with estimated relative risk reductions ranging from 40% to 96%. The  
258 systematic review authors also identified three cross sectional studies examining the use of glasses in  
259 the community, all of which found a substantial underrepresentation of people wearing glasses among  
260 COVID-19 patients [11-13]. In addition, some studies have shown high detection rates of SARS-CoV-  
261 2 in ocular fluids from COVID-19 patients, also indicating that the eyes may be an important route of

262 viral transmission [14, 15]. An earlier systematic review, from 2020, of studies from previous  
263 coronavirus-outbreaks (MERS and SARS), included 12 studies in a meta-analysis indicating that use  
264 of eye protection was associated with considerable reduced infection risk (relative risk 0.34; 95% CI  
265 0.21 to 0.56) [4]. None of the studies were randomized, and nearly all were conducted in health care  
266 settings. Furthermore, a Cochrane-review from 2020 identified no randomized trials of eye protection  
267 to curb the spread of respiratory viruses [3]. While we were conducting our trial, a pre-print with  
268 findings from a cohort study in the UK was published, reporting 15% lower odds of COVID-19 among  
269 consistent users of glasses (OR 0.85, 95% 0.77 to 0.94), after adjusting for key variables e.g. age  
270 [16]. Overall, all these prior findings are compatible with the results of this first large randomized trial.

271

272 Our trial is one of very few randomized trials evaluating public health and social measures for  
273 epidemic control [3, 4, 6]. For example, only two trials of face masks have been conducted during the  
274 COVID-19 pandemic [17, 18]. The results from the two face mask trials are, broadly speaking, in the  
275 same range as ours, i.e. consistent with a modest albeit uncertain effect.

276

### 277 **Strengths and limitations of study**

278 The result for our primary endpoint is very uncertain, with a wide confidence interval compatible with  
279 both important benefit and harm. If we only emphasize this outcome, our trial can be interpreted as  
280 largely “negative” although the confidence interval around the estimate includes a 25% relative  
281 reduction, which is what we had deemed a reasonable minimal important difference in our sample  
282 size estimation [7]. We had probably achieved a more precise estimate had we been more successful  
283 with our recruitment of participants. Despite wide media coverage, we came nowhere near our target  
284 of 22000. Also, a week before we opened recruitment into the trial, the health authorities changed its  
285 recommendations for testing, no longer advising a confirmatory PCR-test for fully vaccinated people  
286 who self-tested positive for COVID-19. Then, 10 days after we started recruitment, the authorities  
287 changed its testing recommendations again, revoking the earlier advise that members of households  
288 with a COVID-19-case should get tested, and recommended that only adults with symptoms should  
289 test themselves. These policy changes were followed by a drastic reduction in the number of test  
290 results reported to the Norwegian Surveillance System for Communicable Diseases (MSIS), i.e. the  
291 data source for our main outcome. We therefore considered changing our main outcome from notified

292 COVID-19 cases to self-reported cases but decided to adhere to the protocol. In our interpretation of  
293 the study findings, we have put more weight on the secondary outcomes, i.e. self-reported positive  
294 COVID-19 test and symptoms consistent with respiratory infection. This decision can reasonably be  
295 challenged.

296

297 There is risk of bias for our survey-based outcomes, since we lack responses from 13% of the  
298 participants. The fact that there were very few notified COVID-19 cases among the non-respondents  
299 indicates that this risk is low.

300 We believe the pragmatic trial approach we adopted is particularly appropriate for evaluations of  
301 public health interventions where real life effectiveness is of key interest, and more so than being able  
302 to demonstrate effects under ideal conditions (e.g. in a laboratory), or to understand underlying  
303 mechanisms [19-21]. We are not able to clearly decipher to what extent the observed effects were  
304 due to increased wearing of glasses, increased use of face masks, differences in the use of public  
305 transport, decreased awareness of symptoms or decreased reporting of outcomes. Consistent with  
306 the pragmatic intent, we sought to be as close as possible to the natural environment and avoid  
307 artificial research scenarios that burden participants with data collection beyond a short questionnaire  
308 at the end of the study. However, we collected some specific information to better understand how the  
309 intervention worked, and this is consistent with the hypothesized mechanism that eye protection  
310 contributes to reduced transmission of respiratory infections. One of the items in the questionnaire  
311 concerned the participants' use of public transport for their daily commute and was meant to capture  
312 their use of public transport at baseline. Interpreting the responses is not straightforward since the  
313 data were collected later, so the responses may have been influenced by taking part in the trial,  
314 including exposure to the intervention.

315 A surprise finding to us is that the use of face masks was substantially higher in the intervention  
316 group, especially since difficulties with combining glasses and face masks was the most common  
317 complaint among those who reported negative experiences.

318 While we believe that our findings are likely to be applicable in many settings beyond ours, there are  
319 some factors that may reduce the applicability. First, we conducted our trial in a phase of the  
320 pandemic where the omicron variant of the virus dominated. It is possible that new variants, or other



321 respiratory viruses, have different modes of transmission. Second, the trial took place during the  
322 Norwegian winter, and the importance of transmission in public spaces may be different in other  
323 seasons or cultural settings. Third, the COVID-19 incidence was exceptionally high during the time of  
324 the trial. Fourth, the effects that the intervention had on behavior, e.g. face mask use, will likely vary  
325 across contexts and populations.

## 326 **Conclusions**

327 The results from our trial seem to support our hypothesis, i.e. that recommending use of glasses in  
328 public reduces the risk of being infected by respiratory viruses. The evidence is uncertain, and the  
329 effect probably modest at best, but since the intervention is simple, low burden, low-cost, and with few  
330 negative consequences, it is worth considering as one component in the infection control toolbox. We  
331 urge others to conduct similar simple, pragmatic trials.

332

## 333 **Declarations**

### 334 **Authors' contributions**

335 AF was the Chief Investigator and led the protocol development. LGH had the original idea for the  
336 study, presenting it in September 2020. AH was responsible for the data collection platform. IHE was  
337 the chief analyst and conducted all statistical analyses, with support from PE who also reviewed the  
338 data and the analyses. AF and IHE wrote the first manuscript draft. All authors contributed to study  
339 design and development of the protocol, and all authors commented on and approved the final  
340 version of the manuscript.

341

### 342 **Funding**

343 All running costs were covered by the Centre for Epidemic Interventions Research (CEIR),  
344 Norwegian Institute of Public Health.

345

### 346 **Competing interests**

347 All authors declare: no competing interests.

348

## 349 **Acknowledgements**

350 Christopher James Rose helped with the statistical analyses. We thank journalist Hallvard Sandberg  
351 who posted a tweet on 4 January 2022, challenging us to investigate the potential of using glasses as  
352 protection against transmission. Dagfinn Bergsager (University of Oslo) facilitated our use of the web-  
353 based questionnaire and safe data storage. For data storage and analyses we used the TSD  
354 (Tjeneste for Sensitive Data) facilities, owned by the University of Oslo, operated and developed by  
355 the TSD service group at the University of Oslo, IT-Department (USIT) ([tsd-drift@usit.uio.no](mailto:tsd-drift@usit.uio.no)). Finally,  
356 we thank all those who volunteered to take part in the trial.

357

## 358 **Data sharing statement**

359 The final anonymized trial dataset will be freely available to the public.

360

## 361 **References**

- 362 1. Maxcy KF. The Transmission of infection through the eye. *Journal of the American Medical*  
363 *Association*. 1919;72(9):636-9. doi: 10.1001/jama.1919.02610090020005.
- 364 2. Coroneo MT, Collignon PJ. SARS-CoV-2: eye protection might be the missing key. *Lancet*  
365 *Microbe*. 2021;2(5):e173-e4. Epub 2021/03/04. doi: 10.1016/S2666-5247(21)00040-9. PubMed  
366 PMID: 33655228; PubMed Central PMCID: PMCPCMC7906687.
- 367 3. Jefferson T, Del Mar CB, Dooley L, Ferroni E, Al-Ansary LA, Bawazeer GA, et al. Physical  
368 interventions to interrupt or reduce the spread of respiratory viruses. *Cochrane Database Syst Rev*.  
369 2020;11:CD006207. Epub 2020/11/21. doi: 10.1002/14651858.CD006207.pub5. PubMed PMID:  
370 33215698; PubMed Central PMCID: PMCPCMC8094623.
- 371 4. Chu DK, Akl EA, Duda S, Solo K, Yaacoub S, Schunemann HJ, et al. Physical distancing, face  
372 masks, and eye protection to prevent person-to-person transmission of SARS-CoV-2 and COVID-19: a  
373 systematic review and meta-analysis. *Lancet*. 2020;395(10242):1973-87. Epub 2020/06/05. doi:  
374 10.1016/S0140-6736(20)31142-9. PubMed PMID: 32497510; PubMed Central PMCID:  
375 PMCPCMC7263814.
- 376 5. Byambasuren O, Beller E, Clark J, Collignon P, Glasziou P. The effect of eye protection on  
377 SARS-CoV-2 transmission: a systematic review. *Antimicrob Resist Infect Control*. 2021;10(1):156.  
378 Epub 2021/11/06. doi: 10.1186/s13756-021-01025-3. PubMed PMID: 34736533; PubMed Central  
379 PMCID: PMCPCMC8567128.
- 380 6. Hirt J, Janiaud P, Hemkens LG. Randomized trials on non-pharmaceutical interventions for  
381 COVID-19: a scoping review. *BMJ Evid Based Med*. 2022. Epub 2022/01/29. doi: 10.1136/bmjebm-  
382 2021-111825. PubMed PMID: 35086864; PubMed Central PMCID: PMCPCMC8804305.
- 383 7. Fretheim A, Hemkens LG, Helleve A, Elgersma IH, Elstrøm P, Kacelnik O. The GLasses Against  
384 transmission of SARS-CoV-2 in the community (GLASSY) trial: A pragmatic randomized trial (study  
385 protocol). *medRxiv*. 2022:2022.02.04.22270120. doi: 10.1101/2022.02.04.22270120.

- 386 8. Zwarenstein M, Treweek S, Gagnier JJ, Altman DG, Tunis S, Haynes B, et al. Improving the  
387 reporting of pragmatic trials: an extension of the CONSORT statement. *BMJ*. 2008;337:a2390. Epub  
388 2008/11/13. doi: 10.1136/bmj.a2390. PubMed PMID: 19001484; PubMed Central PMCID:  
389 PMC3266844.
- 390 9. Lovlie A, Blystad H, Bruun T. MSIS celebrates 40 years. *Tidsskr Nor Laegeforen*. 2015;135(23-  
391 24):2136-8. Epub 2015/12/18. doi: 10.4045/tidsskr.15.1028. PubMed PMID: 26674030.
- 392 10. Blinded assessment of GLASSY-study results [Internet]. Zenodo. 2022 [cited 24.06.2022].
- 393 11. Lehrer S, Rheinstein P. Eyeglasses Reduce Risk of COVID-19 Infection. *In Vivo*.  
394 2021;35(3):1581-2. Epub 2021/04/30. doi: 10.21873/invivo.12414. PubMed PMID: 33910839;  
395 PubMed Central PMCID: PMC3266844.
- 396 12. Saxena AK. Risk of COVID-19 among Spectacles Wearing Population of Northern India.  
397 *Journal of Clinical and Diagnostic Research*. 2021;15(5):NC08-NC11. Epub May 1,2021. doi:  
398 10.7860/jcdr/2021/48079.14899.
- 399 13. Zeng W, Wang X, Li J, Yang Y, Qiu X, Song P, et al. Association of Daily Wear of Eyeglasses  
400 With Susceptibility to Coronavirus Disease 2019 Infection. *JAMA Ophthalmol*. 2020;138(11):1196-9.  
401 Epub 2020/09/17. doi: 10.1001/jamaophthalmol.2020.3906. PubMed PMID: 32936214; PubMed  
402 Central PMCID: PMC3266844.
- 403 14. Azzolini C, Donati S, Premi E, Baj A, Siracusa C, Genoni A, et al. SARS-CoV-2 on Ocular  
404 Surfaces in a Cohort of Patients With COVID-19 From the Lombardy Region, Italy. *JAMA Ophthalmol*.  
405 2021;139(9):956-63. Epub 2021/03/05. doi: 10.1001/jamaophthalmol.2020.5464. PubMed PMID:  
406 33662099; PubMed Central PMCID: PMC3266844.
- 407 15. Zhang X, Chen L, Wang G, Chen L, Huang L, Cao Y, et al. Investigation of SARS-CoV-2 on  
408 Ocular Surface of Coronavirus Disease 2019 Patients Using One-Step Reverse-Transcription Droplet  
409 Digital PCR. *Infect Drug Resist*. 2021;14:5395-401. Epub 2021/12/24. doi: 10.2147/IDR.S335635.  
410 PubMed PMID: 34938087; PubMed Central PMCID: PMC3266844.
- 411 16. Navaratnam AMD, O'Callaghan C, Beale S, Nguyen V, Aryee A, Braithwaite I, et al. Glasses  
412 and risk of COVID-19 transmission - analysis of the Virus Watch Community Cohort study. *medRxiv*.  
413 2022:2022.03.29.22272997. doi: 10.1101/2022.03.29.22272997.
- 414 17. Abaluck J, Kwong LH, Styczynski A, Haque A, Kabir MA, Bates-Jefferys E, et al. Impact of  
415 community masking on COVID-19: A cluster-randomized trial in Bangladesh. *Science*.  
416 2022;375(6577):eabi9069. Epub 2021/12/03. doi: 10.1126/science.abi9069. PubMed PMID:  
417 34855513; PubMed Central PMCID: PMC3266844.
- 418 18. Bundgaard H, Bundgaard JS, Raaschou-Pedersen DET, von Buchwald C, Todsén T, Norsk JB,  
419 et al. Effectiveness of Adding a Mask Recommendation to Other Public Health Measures to Prevent  
420 SARS-CoV-2 Infection in Danish Mask Wearers : A Randomized Controlled Trial. *Ann Intern Med*.  
421 2021;174(3):335-43. Epub 2020/11/19. doi: 10.7326/M20-6817. PubMed PMID: 33205991; PubMed  
422 Central PMCID: PMC3266844.
- 423 19. Schwartz D, Lellouch J. Explanatory and pragmatic attitudes in therapeutical trials. *J Chronic*  
424 *Dis*. 1967;20(8):637-48. Epub 1967/08/01. doi: 10.1016/0021-9681(67)90041-0. PubMed PMID:  
425 4860352.
- 426 20. Treweek S, Zwarenstein M. Making trials matter: pragmatic and explanatory trials and the  
427 problem of applicability. *Trials*. 2009;10:37. Epub 2009/06/06. doi: 10.1186/1745-6215-10-37.  
428 PubMed PMID: 19493350; PubMed Central PMCID: PMC3266844.
- 429 21. Zwarenstein M. 'Pragmatic' and 'explanatory' attitudes to randomised trials. *J R Soc Med*.  
430 2017;110(5):208-18. Epub 2017/05/16. doi: 10.1177/0141076817706303. PubMed PMID: 28504072;  
431 PubMed Central PMCID: PMC3266844.

432

433

434 **Table S1. Crude per protocol analysis**, i.e. only including those in the intervention group who  
435 reported wearing glasses more than 50% of the time, and those in the control group who reported  
436 wearing glasses less than 50% of the time.

437

438 **Table S2. Subgroup analysis using notified COVID-19 cases as outcome.**

439

440 **Table S3. Subgroup analysis for using self-reported COVID-19 cases as outcome.**
